# Supplementary material for: Proliferation-Independent Initiation of Biliary Cysts in Polycystic Liver Diseases
Source: PubMed Central journal article supplement (PMC4488361; doi:10.1371/journal.pone.0132295), 2015-06-30
Supplement: pone.0132295.s001.pdf [file pone.0132295.s001.pdf]

## Supplemental Table 1: List of antibodies used in this study

| Primary antibody | Species/Isotype | Dilution | Manufacturer   | Catalog number |
|------------------|-----------------|----------|----------------|----------------|
| HNF4             | mouse IgG2a     | 1/300    | R&D Systems    | PP-H1415-OO    |
| Ecad             | mouse           | 1/250    | BD Biosciences | 610182         |
| Sox9             | rabbit          | 1/500    | Chemicon       | AB5535         |
| Muc1             | hamster         | 1/500    | Neomarkers     | HM-1630-P      |
| Ki67             | mouse IgG1      | 1/250    | BD Biosciences | 556003         |
| Brdu             | mouse IgG1      | 1/20     | DSHB           | G3G4           |
| P.H3             | rabbit          | 1/100    | Cell Signaling | 9701           |
| aSMA             | mouse IgG2a     | 1/50     | Dako           | M0851          |
| bCat             | mouse IgG1      | 1/1000   | BD Biosciences | 610154         |
| YFP              | goat            | 1/250    | Abcam          | ab6673         |

| Secondary antibody                    | Dilution | Manufacturer           | Catalog number |
|---------------------------------------|----------|------------------------|----------------|
| donkey anti-mouse Alexa Fluor 647     | 1/1000   | Invitrogen             | A31571         |
| goat anti-mouse IgG2a Alexa Fluor 488 | 1/1000   | Invitrogen             | A21131         |
| goat anti-mouse IgG2a Alexa Fluor 594 | 1/1000   | Invitrogen             | A21135         |
| goat anti-mouse IgG2a Alexa Fluor 647 | 1/1000   | Invitrogen             | A21241         |
| goat anti-mouse IgG1 Alexa Fluor 594  | 1/1000   | Invitrogen             | A21125         |
| donkey anti-rabbit Alexa Fluor 488    | 1/1000   | Invitrogen             | A21206         |
| donkey anti-rabbit Alexa Fluor 647    | 1/1000   | Invitrogen             | A31573         |
| donkey anti-goat Alexa Fluor 594      | 1/1000   | Invitrogen             | A11058         |
| biotinylated anti-hamster             | 1/500    | Jackson ImmunoResearch | 127-065-160    |
| streptavidin Alexa Fluor 488          | 1/1000   | Invitrogen             | S11223         |
