# Supplementary material for: Proliferation-Independent Initiation of Biliary Cysts in Polycystic Liver Diseases
Source: PubMed Central journal article supplement (PMC4488361; doi:10.1371/journal.pone.0132295), 2015-06-30
Supplement: pone.0132295.s003.pdf [file pone.0132295.s003.pdf]

| NAME   | PROBE    | GENE SYMBOL | GENE_TITLE                                             | RANK IN GENE LIST | RANK METRIC SCORE    | RUNNING ES | CORE ENRICHMENT |
|--------|----------|-------------|--------------------------------------------------------|-------------------|----------------------|------------|-----------------|
| row_0  | ACTN2    | ACTN2       | actinin, alpha 2                                       | 14                | 0.26711270213127136  | 0.03381263 | Yes             |
| row_1  | ACTA1    | ACTA1       | actin, alpha 1, skeletal                               | 18                | 0.25375592708587646  | 0.06655846 | Yes             |
| row_2  | ACTC1    | ACTC1       | actin, alpha, cardiac                                  | 31                | 0.22748596966266632  | 0.09535025 | Yes             |
| row_3  | CDH6     | CDH6        | cadherin 6, type 2                                     | 43                | 0.21503448486328125  | 0.12258691 | Yes             |
| row_4  | CLDN6    | CLDN6       | claudin 6                                              | 120               | 0.16846275329589844  | 0.13984267 | Yes             |
| row_5  | ADAM23   | ADAM23      | ADAM metalloproteinase                                 | 217               | 0.1439531296491623   | 0.15270643 | Yes             |
| row_6  | DMP1     | DMP1        | dentin matrix acid phosphatase                         | 218               | 0.1437109112739563   | 0.17135447 | Yes             |
| row_7  | KRT31    | KRT31       | keratin 31                                             | 255               | 0.13610656559467316  | 0.18683487 | Yes             |
| row_8  | MPZL1    | MPZL1       | myelin protein zero                                    | 448               | 0.11123429238796234  | 0.18963729 | Yes             |
| row_9  | CDH3     | CDH3        | cadherin 3, type 1                                     | 531               | 0.10421505570411682  | 0.19819273 | Yes             |
| row_10 | CLDN7    | CLDN7       | claudin 7                                              | 548               | 0.10297323763370514  | 0.21058533 | Yes             |
| row_11 | CDSN     | CDSN        | corneodesmosin                                         | 551               | 0.10292921215295792  | 0.22382034 | Yes             |
| row_12 | THY1     | THY1        | Thy-1 cell surface glycoprotein                        | 566               | 0.10212336480617523  | 0.23622383 | Yes             |
| row_13 | IRS1     | IRS1        | insulin receptor substrate 1                           | 615               | 0.09851538389921188  | 0.24609941 | Yes             |
| row_14 | ITGA9    | ITGA9       | integrin, alpha 9                                      | 766               | 0.09089526534080505  | 0.248807   | Yes             |
| row_15 | LAMC2    | LAMC2       | laminin, gamma 2                                       | 808               | 0.08918736129999161  | 0.2578962  | Yes             |
| row_16 | BAIAP2   | BAIAP2      | BAI1-associated protein                                | 836               | 0.08802057057619095  | 0.26768216 | Yes             |
| row_17 | CDH11    | CDH11       | cadherin 11, type 1                                    | 859               | 0.08699466288089752  | 0.2776379  | Yes             |
| row_18 | STX4     | STX4        | syntaxin 4                                             | 943               | 0.08343082666397095  | 0.2834358  | Yes             |
| row_19 | NRAP     | NRAP        | nebulin-related antigen                                | 985               | 0.08153420686721802  | 0.29153192 | Yes             |
| row_20 | NLGN2    | NLGN2       | neuroligin 2                                           | 1355              | 0.06978347897529602  | 0.27823293 | Yes             |
| row_21 | MMP2     | MMP2        | matrix metalloproteinase 2                             | 1521              | 0.06582680344581604  | 0.2767789  | Yes             |
| row_22 | LAMA3    | LAMA3       | laminin, alpha 3                                       | 1572              | 0.06459055095911026  | 0.28213122 | Yes             |
| row_23 | PARD6G   | PARD6G      | par-6 partitioning protein                             | 1631              | 0.06351348757743835  | 0.28685912 | Yes             |
| row_24 | ATP1A3   | ATP1A3      | ATPase, Na <sup>+</sup> /K <sup>+</sup> transporting   | 1642              | 0.06341354548931122  | 0.2944819  | Yes             |
| row_25 | ITGA2    | ITGA2       | integrin, alpha 2 (CD11a)                              | 1904              | 0.05759163573384285  | 0.28614357 | Yes             |
| row_26 | RRAS     | RRAS        | related RAS viral oncogene                             | 2013              | 0.05552288889884949  | 0.28680557 | Yes             |
| row_27 | LAMB3    | LAMB3       | laminin, beta 3                                        | 2086              | 0.05450043827295303  | 0.28951582 | Yes             |
| row_28 | SYMPK    | SYMPK       | symplesin                                              | 2113              | 0.05400937423110008  | 0.29494902 | Yes             |
| row_29 | CTNND1   | CTNND1      | catenin (cadherin-interacting protein 1)               | 2139              | 0.053675029426813126 | 0.30039942 | Yes             |
| row_30 | FBN1     | FBN1        | fibrillin 1                                            | 2153              | 0.05340554192662239  | 0.30654183 | Yes             |
| row_31 | SORBS3   | SORBS3      | sorbin and SH3 domain containing protein               | 2216              | 0.05241628736257553  | 0.30958742 | Yes             |
| row_32 | ADAMT5   | ADAMT5      | ADAM metalloproteinase 5                               | 2313              | 0.051168348640203476 | 0.31041136 | Yes             |
| row_33 | CLDN8    | CLDN8       | claudin 8                                              | 2349              | 0.05050664395093918  | 0.31484482 | Yes             |
| row_34 | AMH      | AMH         | anti-Müllerian hormone                                 | 2480              | 0.04861927404999733  | 0.31327826 | Yes             |
| row_35 | CDH1     | CDH1        | cadherin 1, type 1                                     | 2483              | 0.04859618842601776  | 0.31946298 | Yes             |
| row_36 | PKD1     | PKD1        | polycystic kidney disease 1                            | 2558              | 0.04756420850753784  | 0.321152   | Yes             |
| row_37 | CDH8     | CDH8        | cadherin 8, type 2                                     | 2589              | 0.047227855771780014 | 0.3254629  | Yes             |
| row_38 | CLDN4    | CLDN4       | claudin 4                                              | 2595              | 0.04712264984846115  | 0.3312747  | Yes             |
| row_39 | IKBK     | IKBK        | inhibitor of kappa light chain                         | 2648              | 0.04660945385694504  | 0.33417258 | Yes             |
| row_40 | ARHGGEF6 | ARHGGEF6    | Rac/Cdc42 guanine nucleotide exchange factor 6         | 2727              | 0.04555357247591019  | 0.33535838 | Yes             |
| row_41 | PTPRC    | PTPRC       | protein tyrosine phosphatase receptor type C           | 2778              | 0.04484875127673149  | 0.33814898 | Yes             |
| row_42 | SLIT2    | SLIT2       | slit homolog 2 (Drosophila)                            | 2818              | 0.044225409626960754 | 0.34152505 | Yes             |
| row_43 | SRC      | SRC         | v-src sarcoma (Schreibman sarcoma)                     | 3072              | 0.041022252291440964 | 0.3315213  | Yes             |
| row_44 | TJP1     | TJP1        | tight junction protein 1                               | 3144              | 0.04025885462760925  | 0.33244413 | Yes             |
| row_45 | PDZD3    | PDZD3       | PDZ domain containing protein 3                        | 3254              | 0.03892922401428223  | 0.33089235 | Yes             |
| row_46 | GNAI2    | GNAI2       | guanine nucleotide binding protein (G protein) alpha 2 | 3386              | 0.037437111139297485 | 0.3278142  | Yes             |
| row_47 | MYH10    | MYH10       | myosin, heavy chain 10                                 | 3398              | 0.037328943610191345 | 0.33199164 | Yes             |
| row_48 | PLCG1    | PLCG1       | phospholipase C, gamma 1                               | 3546              | 0.03582628443837166  | 0.3277352  | Yes             |
| row_49 | CERCAM   | null        | null                                                   | 3577              | 0.03553472086787224  | 0.33052877 | Yes             |
| row_50 | ICAM5    | ICAM5       | intercellular adhesion molecule 5                      | 3670              | 0.03481919318437576  | 0.32947356 | Yes             |
| row_51 | CTNNA1   | CTNNA1      | catenin (cadherin-interacting protein 1) 1             | 3708              | 0.034388329833745956 | 0.33169433 | Yes             |
| row_52 | VAV2     | VAV2        | vav 2 oncogene                                         | 3713              | 0.034321241080760956 | 0.33590555 | Yes             |
| row_53 | CDH15    | CDH15       | cadherin 15, M-cadherin                                | 3735              | 0.03417474776506424  | 0.3390679  | Yes             |
| row_54 | GRB7     | GRB7        | growth factor receptor binding protein 7               | 3869              | 0.032969579100608826 | 0.33528888 | Yes             |
| row_55 | VWF      | VWF         | von Willebrand factor                                  | 3877              | 0.03282499313354492  | 0.33912423 | Yes             |
| row_56 | CLDN19   | CLDN19      | claudin 19                                             | 3948              | 0.03211452066898346  | 0.3390508  | Yes             |
| row_57 | COL17A1  | COL17A1     | collagen, type XVII                                    | 3970              | 0.031971294432878494 | 0.34192723 | Yes             |
| row_58 | GAMT     | GAMT        | guanidinoacetate methyltransferase                     | 4007              | 0.031581830233335495 | 0.34384444 | Yes             |
| row_59 | MAP4K2   | MAP4K2      | mitogen-activated protein kinase 4                     | 4022              | 0.031447071582078934 | 0.3470769  | Yes             |
| row_60 | AKT3     | AKT3        | v-akt murine thymoma                                   | 4049              | 0.031169315800070763 | 0.34954637 | Yes             |
| row_61 | PIK3R3   | PIK3R3      | phosphoinositide 3-kinase                              | 4381              | 0.028484424576163292 | 0.33319044 | No              |
| row_62 | ALOX15B  | ALOX15B     | arachidonate 15-lipoxygenase                           | 4446              | 0.027888525277376175 | 0.3329321  | No              |
| row_63 | EVL      | EVL         | Enah/Vasp-like protein                                 | 4461              | 0.027803312987089157 | 0.33569178 | No              |
| row_64 | PCDH1    | PCDH1       | protocadherin 1 (cell adhesion molecule 1)             | 4496              | 0.027591347694396973 | 0.33721232 | No              |
| row_65 | CD276    | CD276       | CD276 molecule                                         | 4498              | 0.027588864788413048 | 0.34073168 | No              |
| row_66 | TRO      | TRO         | trophinin                                              | 4575              | 0.027000075206160545 | 0.33963114 | No              |
| row_67 | VASP     | VASP        | vasodilator-stimulated phosphoprotein                  | 4584              | 0.026935797184705734 | 0.3426417  | No              |
| row_68 | SPEG     | SPEG        | SPEG complex loci                                      | 4617              | 0.02654712274670601  | 0.34414792 | No              |
| row_69 | SDC3     | SDC3        | syndecan 3 (N-syndecan)                                | 4699              | 0.02587352693080902  | 0.34259826 | No              |
| row_70 | SHROOM2  | SHROOM2     | shroom family member 2                                 | 4780              | 0.025398878380656242 | 0.3410476  | No              |
| row_71 | MYH9     | MYH9        | myosin, heavy chain 9                                  | 4822              | 0.025073468685150146 | 0.34181738 | No              |
| row_72 | AMIGO2   | AMIGO2      | adhesion molecule 2                                    | 4826              | 0.025048598647117615 | 0.34488598 | No              |
| row_73 | CDH4     | CDH4        | cadherin 4, type 1                                     | 5057              | 0.023211216554045677 | 0.33396438 | No              |
| row_74 | SGCE     | SGCE        | sarcoglycan, epsilon                                   | 5066              | 0.02313755825161934  | 0.33648208 | No              |

|         |         |         |                       |       |                       |             |    |
|---------|---------|---------|-----------------------|-------|-----------------------|-------------|----|
| row_75  | MSN     | MSN     | moesin                | 5161  | 0.022545630112290382  | 0.33371308  | No |
| row_76  | ACTG1   | ACTG1   | actin, gamma 1        | 5255  | 0.02184957265853882   | 0.33091432  | No |
| row_77  | EPB41L2 | EPB41L2 | erythrocyte memk      | 5334  | 0.021164024248719215  | 0.32893533  | No |
| row_78  | WASL    | WASL    | Wiskott-Aldrich sy    | 5347  | 0.02104313299059868   | 0.3309389   | No |
| row_79  | VCAN    | null    | null                  | 5452  | 0.020276620984077454  | 0.32726967  | No |
| row_80  | PARVA   | PARVA   | parvin, alpha         | 5635  | 0.018984748050570488  | 0.31870753  | No |
| row_81  | ADAM15  | ADAM15  | ADAM metallopep       | 5664  | 0.01870023086667061   | 0.31943783  | No |
| row_82  | FYB     | FYB     | FYN binding prote     | 5731  | 0.018305890262126923  | 0.31781492  | No |
| row_83  | CLDN9   | CLDN9   | claudin 9             | 5751  | 0.01812940649688244   | 0.31901637  | No |
| row_84  | CADM2   | null    | null                  | 5760  | 0.01806326024234295   | 0.32087564  | No |
| row_85  | CLDN5   | CLDN5   | claudin 5 (transme    | 5772  | 0.0179949589073658    | 0.32254428  | No |
| row_86  | ACTG2   | ACTG2   | actin, gamma 2, sr    | 5840  | 0.017471861094236374  | 0.32075256  | No |
| row_87  | NEXN    | NEXN    | nexilin (F actin bin  | 5879  | 0.017107892781496048  | 0.32067046  | No |
| row_88  | PPP2R2C | PPP2R2C | protein phosphata     | 5954  | 0.016642002388834953  | 0.31834698  | No |
| row_89  | INPPL1  | INPPL1  | inositol polyphosp    | 5989  | 0.016450630500912666  | 0.3184219   | No |
| row_90  | NLGN3   | NLGN3   | neuroigin 3           | 6201  | 0.015151012688875198  | 0.30760545  | No |
| row_91  | CAP1    | CAP1    | CAP, adenylate cy     | 6572  | 0.012627212330698967  | 0.28682923  | No |
| row_92  | FSCN1   | FSCN1   | fascin homolog 1,     | 6853  | 0.010892949067056179  | 0.2712802   | No |
| row_93  | PTK2    | PTK2    | PTK2 protein tyros    | 6878  | 0.010760599747300148  | 0.2712226   | No |
| row_94  | RAC2    | RAC2    | ras-related C3 bot    | 6916  | 0.010544607415795326  | 0.27034938  | No |
| row_95  | EXOC4   | EXOC4   | exocyst complex c     | 6964  | 0.010272497311234474  | 0.26883507  | No |
| row_96  | NF1     | NF1     | neurofibromin 1 (r    | 7009  | 0.009988432750105858  | 0.26746565  | No |
| row_97  | DHX16   | DHX16   | DEAH (Asp-Glu-Alc     | 7159  | 0.00888897106051445   | 0.25959262  | No |
| row_98  | ACTB    | ACTB    | actin, beta           | 7160  | 0.00888433400541544   | 0.26074544  | No |
| row_99  | DSC1    | DSC1    | desmocollin 1         | 7175  | 0.008716538548469543  | 0.26102838  | No |
| row_100 | NF2     | NF2     | neurofibromin 2 (l    | 7193  | 0.008609936572611332  | 0.26111576  | No |
| row_101 | CLDN15  | CLDN15  | claudin 15            | 7205  | 0.008549223653972149  | 0.2615587   | No |
| row_102 | TSC1    | TSC1    | tuberous sclerosis    | 7258  | 0.008318696171045303  | 0.259488    | No |
| row_103 | MAPK13  | MAPK13  | mitogen-activated     | 7348  | 0.007725995499640703  | 0.25509888  | No |
| row_104 | PVRL4   | PVRL4   | poliovirus recepto    | 7361  | 0.007651152554899454  | 0.25536472  | No |
| row_105 | TMEM8B  | null    | null                  | 7384  | 0.007519801147282123  | 0.2550077   | No |
| row_106 | MPP5    | MPP5    | membrane proteir      | 7486  | 0.006916715297847986  | 0.24978663  | No |
| row_107 | VCL     | VCL     | vinculin              | 7580  | 0.006409883499145508  | 0.2449844   | No |
| row_108 | ACTN3   | ACTN3   | actinin, alpha 3      | 7780  | 0.005330526269972324  | 0.23362061  | No |
| row_109 | TUBG1   | TUBG1   | tubulin, gamma 1      | 7859  | 0.004861128982156515  | 0.22952613  | No |
| row_110 | TAOK2   | TAOK2   | TAO kinase 2          | 7930  | 0.004489051643759012  | 0.225868    | No |
| row_111 | MMP9    | MMP9    | matrix metallopep     | 7988  | 0.004110051784664392  | 0.22294824  | No |
| row_112 | PFN1    | PFN1    | profilin 1            | 8026  | 0.003897694637998938  | 0.22121254  | No |
| row_113 | PVRL2   | PVRL2   | poliovirus recepto    | 8073  | 0.003687557764351368  | 0.21890435  | No |
| row_114 | ARPC2   | ARPC2   | actin related prote   | 8125  | 0.003396095475181937  | 0.21625543  | No |
| row_115 | CD34    | CD34    | CD34 molecule         | 8132  | 0.003365738783031702  | 0.21632868  | No |
| row_116 | DLG1    | DLG1    | discs, large homol    | 8158  | 0.003146451199427247  | 0.21522246  | No |
| row_117 | WNK4    | WNK4    | WNK lysine deficie    | 8252  | 0.002555466722697019  | 0.2099201   | No |
| row_118 | FLNC    | FLNC    | filamin C, gamma 1    | 8307  | 0.00231961440294981   | 0.20694974  | No |
| row_119 | MYL12B  | null    | null                  | 8359  | 0.001947141601704061  | 0.20411281  | No |
| row_120 | ADRA1B  | ADRA1B  | adrenergic, alpha-    | 8371  | 0.001867240760475397  | 0.20368871  | No |
| row_121 | CX3CL1  | CX3CL1  | chemokine (C-X3-C     | 8374  | 0.001861267141066491  | 0.20380908  | No |
| row_122 | CLDN11  | CLDN11  | claudin 11 (oligod    | 8399  | 0.001726338407024741  | 0.20257916  | No |
| row_123 | MDK     | MDK     | midkine (neurite g    | 8467  | 0.001304792007431388  | 0.19868958  | No |
| row_124 | ACTN4   | ACTN4   | actinin, alpha 4      | 8472  | 0.001263816608116030  | 0.19861126  | No |
| row_125 | GTF2F1  | GTF2F1  | general transcripti   | 8560  | 7,56E+11              | 0.19343892  | No |
| row_126 | ITGB1   | ITGB1   | integrin, beta 1 (fil | 8607  | 4,57E+12              | 0.19071147  | No |
| row_127 | HADH    | HADH    | hydroxyacyl-Coen:     | 8614  | 4,16E+11              | 0.19040197  | No |
| row_128 | ZYX     | ZYX     | zyxin                 | 8640  | 2,85E+11              | 0.18892448  | No |
| row_129 | GNAI1   | GNAI1   | guanine nucleotid     | 8709  | -7,40E+09             | 0.18481462  | No |
| row_130 | TRAF1   | TRAF1   | TNF receptor-asso     | 8952  | -0.001497806631959974 | 0.17034853  | No |
| row_131 | ICAM2   | ICAM2   | intercellular adhe    | 8967  | -0.001558286254294214 | 0.1697026   | No |
| row_132 | SYK     | SYK     | spleen tyrosine kir   | 9207  | -0.00288836192339658  | 0.15559869  | No |
| row_133 | LAYN    | LAYN    | layilin               | 9253  | -0.00315565872006118  | 0.15328205  | No |
| row_134 | ACTN1   | ACTN1   | actinin, alpha 1      | 9255  | -0.00318475067615509  | 0.15363473  | No |
| row_135 | COL16A1 | COL16A1 | collagen, type XVI,   | 9262  | -0.00322184152901172  | 0.15368931  | No |
| row_136 | TSPAN4  | TSPAN4  | tetraspanin 4         | 9521  | -0.004803366493433714 | 0.13868287  | No |
| row_137 | CD209   | CD209   | CD209 molecule        | 9560  | -0.00502900639548897  | 0.13703339  | No |
| row_138 | SLC30A3 | SLC30A3 | solute carrier fami   | 9752  | -0.00612033763900399  | 0.12625672  | No |
| row_139 | SIRPA   | SIRPA   | signal-regulatory p   | 9759  | -0.00617086142301559  | 0.12669396  | No |
| row_140 | MPZL2   | null    | null                  | 9793  | -0.00637040752917528  | 0.12552145  | No |
| row_141 | INSIG1  | INSIG1  | insulin induced ge    | 10030 | -0.00792972650378942  | 0.11225345  | No |
| row_142 | YWHAH   | YWHAH   | tyrosine 3-mono-      | 10058 | -0.00813588127493858  | 0.1116735   | No |
| row_143 | AMIGO1  | AMIGO1  | adhesion molecul      | 10086 | -0.00832285452634096  | 0.11111781  | No |
| row_144 | RSU1    | RSU1    | Ras suppressor pr     | 10248 | -0.00919717922806739  | 0.1025578   | No |
| row_145 | CDK8    | CDK8    | cyclin-dependent l    | 10252 | -0.00924716982990503  | 0.10357598  | No |
| row_146 | PTEN    | PTEN    | phosphatase and t     | 10668 | -0.01171608269214630  | 0.07995542  | No |
| row_147 | PVRL1   | PVRL1   | poliovirus recepto    | 10701 | -0.01190018374472856  | 0.079561025 | No |
| row_148 | VCAM1   | VCAM1   | vascular cell adhe    | 10777 | -0.01234873477369546  | 0.07661988  | No |
| row_149 | MYL9    | MYL9    | myosin, light chair   | 10791 | -0.01243281457573175  | 0.077445626 | No |
| row_150 | HRAS    | HRAS    | v-Ha-ras Harvey ra    | 10821 | -0.01266385149210691  | 0.077332065 | No |

|         |           |           |                      |       |                      |               |    |
|---------|-----------|-----------|----------------------|-------|----------------------|---------------|----|
| row_151 | MAPK14    | MAPK14    | mitogen-activated    | 10992 | -0.01371455565094947 | 0.06881302    | No |
| row_152 | CD86      | CD86      | CD86 molecule        | 11016 | -0.01387321203947067 | 0.069219865   | No |
| row_153 | EGFR      | EGFR      | epidermal growth     | 11069 | -0.01430828310549259 | 0.06792635    | No |
| row_154 | ADAM9     | ADAM9     | ADAM metallopro      | 11122 | -0.01459175720810890 | 0.066669606   | No |
| row_155 | MADCAM1   | MADCAM1   | mucosal vascular     | 11497 | -0.01739230193197727 | 0.046269387   | No |
| row_156 | THBS3     | THBS3     | thrombospondin       | 11624 | -0.01840431429445743 | 0.04102442    | No |
| row_157 | ITGB4     | ITGB4     | integrin, beta 4     | 11630 | -0.01846194267272949 | 0.043117154   | No |
| row_158 | CNTN1     | CNTN1     | contactin 1          | 11644 | -0.01857792027294635 | 0.044740293   | No |
| row_159 | AKT2      | AKT2      | v-akt murine thym    | 11835 | -0.01998194120824337 | 0.0358229     | No |
| row_160 | JAM3      | JAM3      | junctional adhesio   | 11959 | -0.02092323079705238 | 0.031086529   | No |
| row_161 | CNN2      | CNN2      | calponin 2           | 11996 | -0.02122393064200878 | 0.03165967    | No |
| row_162 | ITGA3     | ITGA3     | integrin, alpha 3 (  | 12049 | -0.02167562767863273 | 0.031322137   | No |
| row_163 | DSC3      | DSC3      | desmocollin 3        | 12506 | -0.02535995841026306 | 0.0069882213  | No |
| row_164 | KCNH2     | KCNH2     | potassium voltage    | 12511 | -0.02539883181452751 | 0.010041673   | No |
| row_165 | PECAM1    | PECAM1    | platelet/endotheli   | 12526 | -0.02551436796784401 | 0.012504312   | No |
| row_166 | SHC1      | SHC1      | SHC (Src homolog)    | 12579 | -0.02595806308090686 | 0.012722472   | No |
| row_167 | PIK3CB    | PIK3CB    | phosphoinositide-    | 12645 | -0.02649287134408950 | 0.012222485   | No |
| row_168 | SKAP2     | SKAP2     | src kinase associat  | 13033 | -0.02993036806583404 | -0.007338327  | No |
| row_169 | LDLRAP1   | LDLRAP1   | low density lipopri  | 13043 | -0.03003254532814026 | -0.0039865035 | No |
| row_170 | NFASC     | NFASC     | neurofascin homo     | 13228 | -0.03172461315989494 | -0.011016679  | No |
| row_171 | CRAT      | CRAT      | carnitine acetyltra  | 13258 | -0.03196200728416443 | -0.008626094  | No |
| row_172 | NRXN2     | NRXN2     | neurexin 2           | 13383 | -0.03306278213858604 | -0.011847805  | No |
| row_173 | CLDN14    | CLDN14    | claudin 14           | 13394 | -0.03316264972090721 | -0.008150398  | No |
| row_174 | PVRL3     | PVRL3     | poliovirus recepto   | 13417 | -0.03338585048913956 | -0.005150991  | No |
| row_175 | PBX2      | PBX2      | pre-B-cell leukemi   | 13462 | -0.03374621644616127 | -0.003437591  | No |
| row_176 | RASA1     | RASA1     | RAS p21 protein a    | 13589 | -0.03522463142871857 | -0.0064999405 | No |
| row_177 | B4GALT1   | B4GALT1   | UDP-Gal:betaGlcN     | 13709 | -0.03654562681913376 | -0.008966814  | No |
| row_178 | LIMA1     | LIMA1     | LIM domain and a     | 13811 | -0.03805079683661461 | -0.010147929  | No |
| row_179 | NEGR1     | NEGR1     | neuronal growth r    | 14169 | -0.04257116466760635 | -0.02625105   | No |
| row_180 | JUP       | JUP       | junction plakoglob   | 14181 | -0.04279167577624321 | -0.021364752  | No |
| row_181 | CRB3      | CRB3      | crumbs homolog 3     | 14223 | -0.04340951144695282 | -0.018215695  | No |
| row_182 | BMP1      | BMP1      | bone morphogene      | 14273 | -0.04411891847848892 | -0.015459226  | No |
| row_183 | ZAK       | ZAK       | -                    | 14664 | -0.05035537481307983 | -0.032551415  | No |
| row_184 | CALB2     | CALB2     | calbindin 2, 29kDa   | 14716 | -0.05101010575890541 | -0.0290219    | No |
| row_185 | TIAL1     | TIAL1     | TIA1 cytotoxic gra   | 14944 | -0.05556433275341987 | -0.035563573  | No |
| row_186 | CADM3     | CADM3     | null                 | 14950 | -0.05568759143352508 | -0.028640408  | No |
| row_187 | COL9A1    | COL9A1    | collagen, type IX, a | 15047 | -0.05762537196278572 | -0.026978608  | No |
| row_188 | CD274     | CD274     | CD274 molecule       | 15153 | -0.06025306507945061 | -0.02552106   | No |
| row_189 | ICAM1     | ICAM1     | intercellular adhes  | 15234 | -0.06221110001206398 | -0.022294927  | No |
| row_190 | TGFBI     | TGFBI     | transforming grow    | 15445 | -0.0675186961889267  | -0.026255524  | No |
| row_191 | MVD       | MVD       | mevalonate (diph     | 15806 | -0.08156796544790268 | -0.03748013   | No |
| row_192 | CLDN18    | CLDN18    | claudin 18           | 16018 | -0.09117062389850616 | -0.038432214  | No |
| row_193 | TNFRSF11B | TNFRSF11B | tumor necrosis fac   | 16311 | -0.11351769417524338 | -0.041391533  | No |
| row_194 | RHOF      | RHOF      | ras homolog gene     | 16325 | -0.1158490926027298  | -0.027146408  | No |
| row_195 | MAPK11    | MAPK11    | mitogen-activated    | 16351 | -0.1180209144949913  | -0.013346431  | No |
| row_196 | ICAM4     | ICAM4     | intercellular adhes  | 16361 | -0.11986483633518219 | 0.001662102   | No |
| row_197 | NRTN      | NRTN      | neurturin            | 16511 | -0.14685648679733276 | 0.011691842   | No |
